# Supplementary material for: Urolithins: potential biomarkers of gut dysbiosis and disease stage in Parkinson's patients
Source: Royal Society of Chemistry journal article supplement (doi:10.1039/d2fo00552b), 2022-01-01

1

## Supporting Data

2 **Fig. S1** Functional predictions for the faecal microbiome of PD patients. 2D Score plot  
 3 of PLS-DA analysis between (A) Mild Parkinson's disease (MPD) and Severe Parkinson's  
 4 disease (SPD) groups and (B) between urolithin production (+) vs non-production (-) in  
 5 PD patients. (C) LDA score (log 10) generated by LEfSe analysis shows potential  
 6 microbial biomarkers of MPD (1–2.5) and SPD (3–5) patients based on the Hoehn &  
 7 Yahr stage. The green and red dashed lines highlight the biomarkers discussed in the  
 8 text.

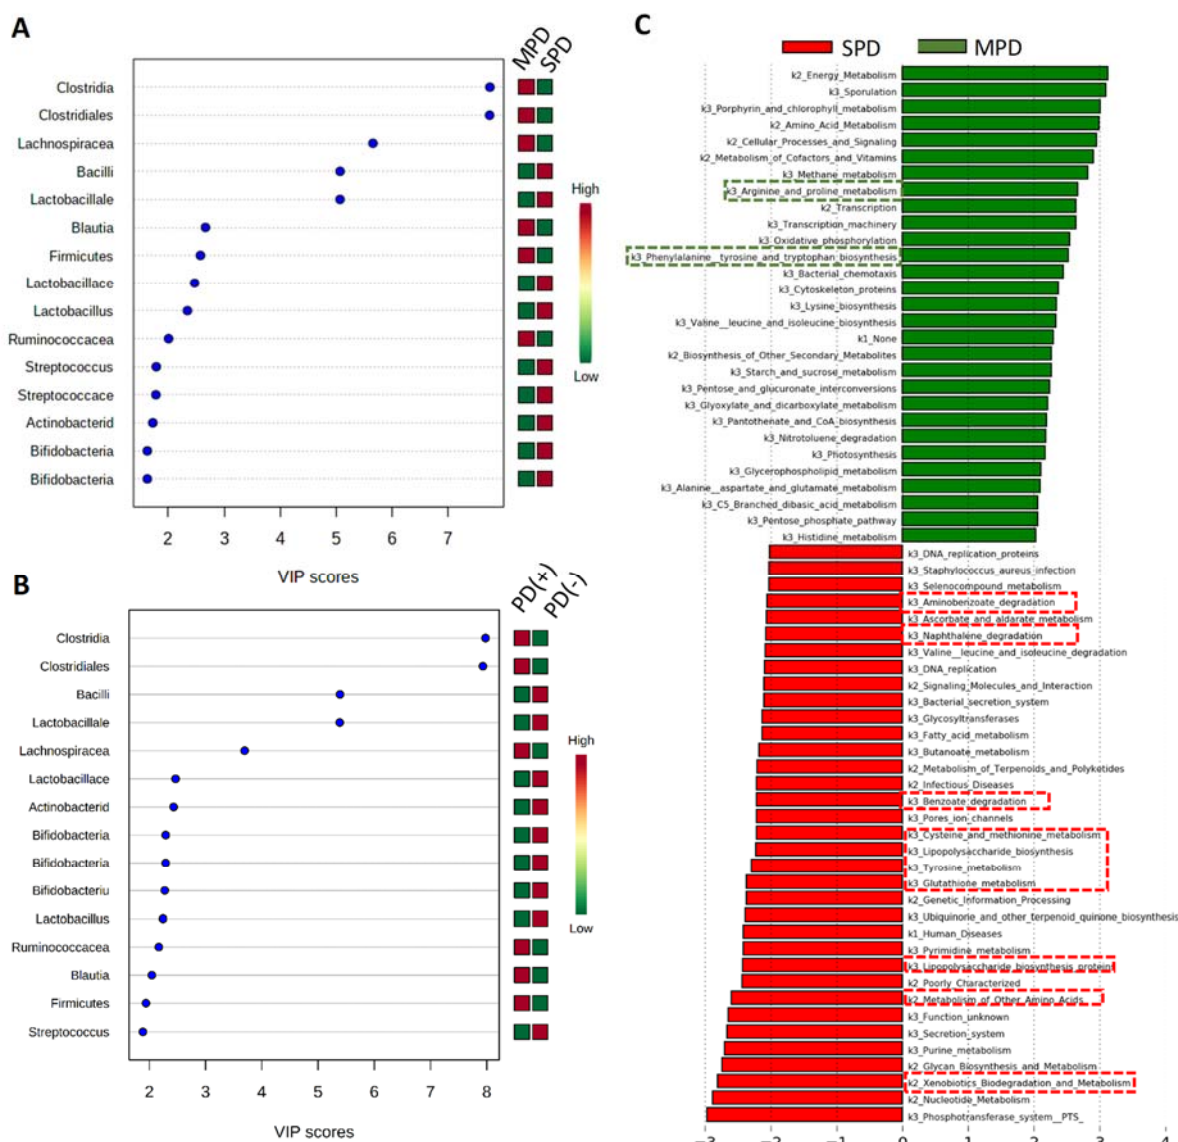

9

10 **Fig. S2** Differences in the faecal microbiome between urolithin producers (+) and  
 11 urolithin non-producers (+) in healthy controls (HC). (A) LDA score (log 10) and (B)  
 12 cladogram generated by LEfSe analysis show potential microbial biomarkers of  
 13 urolithin production (+) vs non-production (-) in HC volunteers.

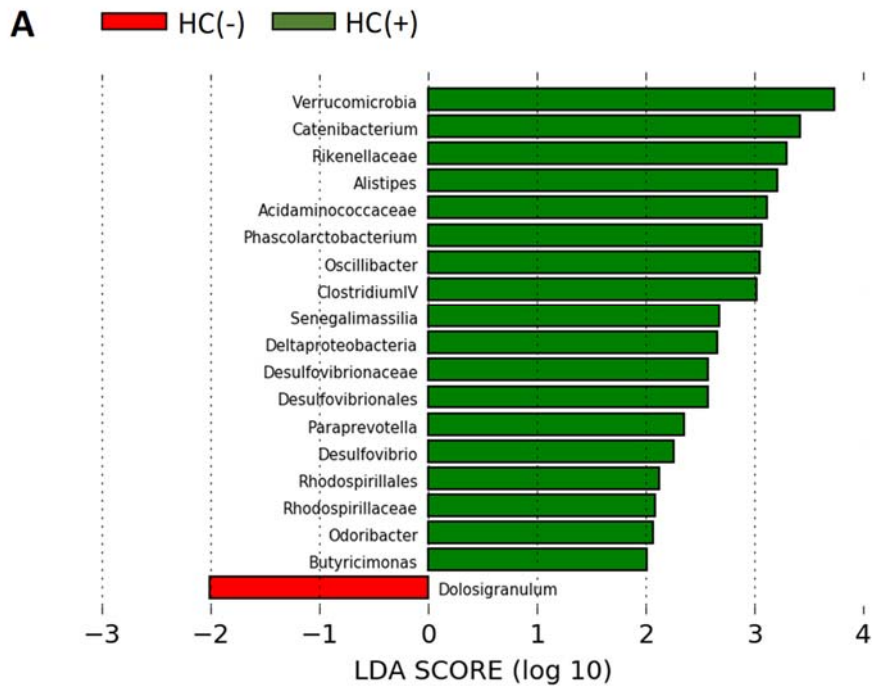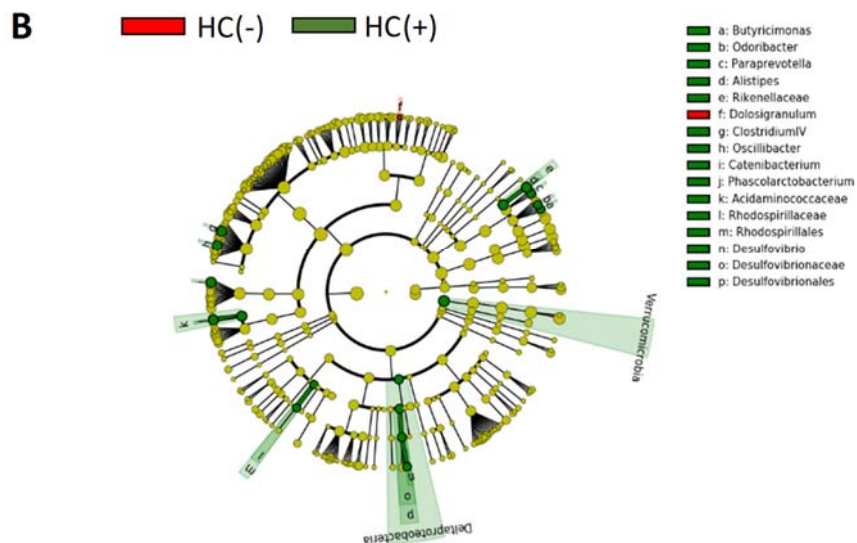

Supplement: d2fo00552b1.pdf [file d2fo00552b1.pdf]
